# Supplementary material for: Validating estimates of prevalence of non-communicable diseases based on household surveys: the symptomatic diagnosis study
Source: Springer Nature journal article supplement (doi:10.1186/s12916-014-0245-8), 2015-01-23
Supplement: MOESM1 [file 9758640]

### Additional file 1: Medically relevant symptomatic diagnosis questionnaire items.

| Item    | Question ( <i>HCE items are italicized</i> )                                                                                                                                        |
|---------|-------------------------------------------------------------------------------------------------------------------------------------------------------------------------------------|
| sd4_01  | <i>Have you ever been told by a health provider that you have chronic bronchitis, emphysema, or chronic obstructive pulmonary disease (COPD)?</i>                                   |
| sd4_02a | <i>How long ago, in months or years, were you told by a health provider that you have chronic bronchitis, emphysema, or chronic obstructive pulmonary disease (COPD)? [specify]</i> |
| sd4_02b | <i>How long ago, in months or years, were you told by a health provider that you have chronic bronchitis, emphysema, or chronic obstructive pulmonary disease (COPD)?</i>           |
| sd4_03  | <i>Are you currently taking medication for chronic bronchitis, emphysema, or chronic obstructive pulmonary disease (COPD)?</i>                                                      |
| sd4_04  | <i>Have you ever been told by a health provider that you have heart failure?</i>                                                                                                    |
| sd4_05a | <i>How long ago, in months or years, were you told by a health provider that you have heart failure?</i>                                                                            |
| sd4_52b | <i>How long ago, in months or years, were you told by a health provider that you have heart failure?</i>                                                                            |
| sd4_06  | <i>Are you currently taking medication for heart failure?</i>                                                                                                                       |
| sd4_07  | <i>Have you ever been told by a health provider that you have cirrhosis?</i>                                                                                                        |
| sd4_8a  | <i>How long ago, in months or years, were you told by a health provider that you have cirrhosis?</i>                                                                                |
| sd4_8b  | <i>How long ago, in months or years, were you told by a health provider that you have cirrhosis?</i>                                                                                |
| sd4_09  | <i>Are you currently taking medication for cirrhosis?</i>                                                                                                                           |
| sd4_10  | <i>Have you ever been told by a health provider that you have liver failure?</i>                                                                                                    |
| sd4_11a | <i>How long ago, in months or years, were you told by a health provider that you have liver failure?</i>                                                                            |
| sd4_11b | <i>How long ago, in months or years, were you told by a health provider that you have liver failure?</i>                                                                            |
| sd4_12  | <i>Are you currently taking medication for liver failure?</i>                                                                                                                       |
| sd4_13  | <i>Have you ever been told by a health provider that you have angina?</i>                                                                                                           |
| sd4_14a | <i>How long ago, in months or years, were you told by a health provider that you have angina?</i>                                                                                   |
| sd4_14b | <i>How long ago, in months or years, were you told by a health provider that you have angina?</i>                                                                                   |
| sd4_15  | <i>Are you currently taking medication for angina?</i>                                                                                                                              |
| sd4_16  | <i>Have you ever been told by a health provider that you have angina?</i>                                                                                                           |
| sd4_17  | <i>What type of arthritis did they say you had?</i>                                                                                                                                 |
| sd4_18a | <i>How long ago, in months or years, were you told by a health provider that you have arthritis?</i>                                                                                |
| sd4_18b | <i>How long ago, in months or years, were you told by a health provider that you have arthritis?</i>                                                                                |
| sd4_19  | <i>Are you currently taking medication for arthritis?</i>                                                                                                                           |

|                |                                                                                                                                                                                          |
|----------------|------------------------------------------------------------------------------------------------------------------------------------------------------------------------------------------|
| <b>sd4_20</b>  | <i>Have you ever been told by a health provider that you have asthma?</i>                                                                                                                |
| <b>sd4_21a</b> | <i>How long ago, in months or years, were you told by a health provider that you have asthma?</i>                                                                                        |
| <b>sd4_21b</b> | <i>How long ago, in months or years, were you told by a health provider that you have asthma?</i>                                                                                        |
| <b>sd4_22</b>  | <i>Are you currently taking medication for asthma?</i>                                                                                                                                   |
| <b>sd4_23</b>  | <i>Have you ever been told by a health provider that you have depression?</i>                                                                                                            |
| <b>sd4_24a</b> | <i>How long ago, in months or years, were you told by a health provider that you have depression?</i>                                                                                    |
| <b>sd4_24b</b> | <i>How long ago, in months or years, were you told by a health provider that you have depression?</i>                                                                                    |
| <b>sd4_25</b>  | <i>Are you currently taking medication for depression?</i>                                                                                                                               |
| <b>sd4_26</b>  | <i>Have you ever been told by a health provider, including an optician, that you have a cataract in one or both of your eyes (that is, an opacity in the lens of the eye)?</i>           |
| <b>sd4_27</b>  | <i>Have you ever had eye surgery to remove your cataract(s)?</i>                                                                                                                         |
| <b>sd4_28</b>  | <i>Have you ever had your eyes checked by a health provider, including an optician?</i>                                                                                                  |
| <b>sd4_29a</b> | <i>How long ago, in months or years, was your vision checked by a health provider?</i>                                                                                                   |
| <b>sd4_29b</b> | <i>How long ago, in months or years, was your vision checked by a health provider?</i>                                                                                                   |
| <b>sd4_30</b>  | Do you wear glasses or contact lenses?                                                                                                                                                   |
| <b>sd4_31</b>  | Wearing your glasses or contact lenses, how much difficulty do you have in seeing and recognizing a person you know across the road (i.e. from a distance of about 20 meters)?           |
| <b>sd4_32</b>  | Wearing your glasses or contact lenses, how much difficulty do you have in seeing and recognizing an object at arm's length or in reading?                                               |
| <b>sd4_33</b>  | If you are NOT wearing glasses or contact lenses, how much difficulty do you have in seeing and recognizing a person you know across the road (i.e. from a distance of about 20 meters)? |
| <b>sd4_34</b>  | If you are NOT wearing your glasses or contact lenses, how much difficulty do you have in seeing and recognizing an object at arm's length or in reading?                                |
| <b>sd4_35</b>  | Does respondent use glasses/contacts or not (for skip pattern)                                                                                                                           |
| <b>sd4_36</b>  | How much difficulty do you have in seeing and recognizing a person you know across the road (i.e. from a distance of about 20 meters)?                                                   |
| <b>sd4_37</b>  | How much difficulty do you have in seeing and recognizing an object at arm's length or in reading?                                                                                       |
| <b>sd4_38</b>  | <i>Have you ever had your hearing checked by a health provider?</i>                                                                                                                      |
| <b>sd4_39a</b> | <i>How long ago, in months or years, was your hearing last checked by a health provider?</i>                                                                                             |
| <b>sd4_39b</b> | <i>How long ago, in months or years, was your hearing last checked by a health provider?</i>                                                                                             |
| <b>sd4_40</b>  | Do you have deafness or trouble hearing in one or both ears without the help of a hearing aid?                                                                                           |
| <b>sd4_41</b>  | <i>Are you currently wearing a hearing aid?</i>                                                                                                                                          |
| <b>sd4_42</b>  | <i>Do you have trouble hearing in one or both ears even with a hearing aid?</i>                                                                                                          |
| <b>sd5_1</b>   | Have you had productive cough for at least two weeks in a year especially in the cold seasons?                                                                                           |
| <b>sd5_2</b>   | Have you had shortness of breath during the time you had a productive cough?                                                                                                             |
| <b>sd5_3</b>   | Have you had non-productive cough?                                                                                                                                                       |
| <b>sd5_4</b>   | Have you had attacks of shortness of breath?                                                                                                                                             |
| <b>sd5_5</b>   | Have you had shortness of breath that gets worse when you lie down, like during sleep?                                                                                                   |

---

|               |                                                                                                                                                                            |
|---------------|----------------------------------------------------------------------------------------------------------------------------------------------------------------------------|
| <b>sd5_6</b>  | Have you had wheezing?                                                                                                                                                     |
| <b>sd5_7</b>  | Have you had chest pain?                                                                                                                                                   |
| <b>sd5_8</b>  | Have you had swelling around your ankle?                                                                                                                                   |
| <b>sd5_9</b>  | Have you had a period lasting several days when you felt sad, empty or depressed?                                                                                          |
| <b>sd5_10</b> | Did this period last more than 2 weeks?                                                                                                                                    |
| <b>sd5_11</b> | Did this period last most of the day?                                                                                                                                      |
| <b>sd5_12</b> | Was this period nearly every day?                                                                                                                                          |
| <b>sd5_13</b> | During this period, did your appetite increase or decrease?                                                                                                                |
| <b>sd5_14</b> | During this period, did you lose or gain weight without it being your intention?                                                                                           |
| <b>sd5_15</b> | During this period did you notice any slowing down in your thinking?                                                                                                       |
| <b>sd5_16</b> | During this period, did you have insomnia or sleep excessively most of the time?                                                                                           |
| <b>sd5_17</b> | During this period, did you feel tired and without energy all of the time?                                                                                                 |
| <b>sd5_18</b> | During this period, did you feel guilty or useless?                                                                                                                        |
| <b>sd5_19</b> | During this period, did you have trouble concentrating or making decisions?                                                                                                |
| <b>sd5_20</b> | During this period, did you want to hurt yourself or be dead, or did you think of how to kill yourself or commit suicide?                                                  |
| <b>sd5_21</b> | Have you had a period lasting several days when you lost interest in most things that you usually enjoy such as pastimes, relationships, or work?                          |
| <b>sd5_22</b> | Did this period last more than 2 weeks?                                                                                                                                    |
| <b>sd5_23</b> | Did this period last most of the day?                                                                                                                                      |
| <b>sd5_24</b> | Was this period nearly every day?                                                                                                                                          |
| <b>sd5_25</b> | During this period, did your appetite increase or decrease?                                                                                                                |
| <b>sd5_26</b> | During this period, did you lose or gain weight without it being your intention?                                                                                           |
| <b>sd5_27</b> | During this period did you notice any slowing down in your thinking?                                                                                                       |
| <b>sd5_28</b> | During this period, did you have insomnia or sleep excessively most of the time?                                                                                           |
| <b>sd5_29</b> | During this period, did you feel guilty or useless?                                                                                                                        |
| <b>sd5_30</b> | During this period, did you have trouble concentrating or making decisions?                                                                                                |
| <b>sd5_31</b> | During this period, did you want to hurt yourself or be dead, or did you think of how to kill yourself or commit suicide?                                                  |
| <b>sd5_32</b> | During this period, did you feel tired and without energy all of the time?                                                                                                 |
| <b>sd5_33</b> | During this period, did those depressive symptoms cause significant discomfort or make it difficult to work or socialize, or affect your life in general in any other way? |
| <b>sd5_34</b> | During this period, were those symptoms caused completely by the loss of a loved one?                                                                                      |
| <b>sd5_35</b> | During this period, were those symptoms similar to those that someone in similar circumstances would experience?                                                           |
| <b>sd5_36</b> | During this period, do you remember having taken any medicine or drug right before or associated with the start of those depressive symptoms?                              |
| <b>sd5_37</b> | During this period, do you remember having suffered from or acquired an illness just before or associated with the beginning of those depressive symptoms?                 |
| <b>sd5_38</b> | Do you know if any family member such as your daughter, son, mother, father, grandfather or grandmother suffered from or were treated for depression at any point?         |
| <b>sd5_39</b> | Do you have difficulty following a conversation in a noisy environment?                                                                                                    |
| <b>sd5_40</b> | Are you able to hear out of both of your ears?                                                                                                                             |

---

|                |                                                                                                                                                                                 |
|----------------|---------------------------------------------------------------------------------------------------------------------------------------------------------------------------------|
| <b>sd5_41</b>  | Are you able to hear when you are using a phone?                                                                                                                                |
| <b>sd5_42</b>  | Do you have ringing in the ears?                                                                                                                                                |
| <b>sd5_43</b>  | Have you ever experienced back pain (including disc problems) during the last 30 days?                                                                                          |
| <b>sd5_44a</b> | How many days did you have this back pain for during the last 30 days? [specify]                                                                                                |
| <b>sd5_44b</b> | How many days did you have this back pain for during the last 30 days?                                                                                                          |
| <b>sd5_45</b>  | Have you experienced joint inflammation in a symmetrical pattern (both sides of the joint affected rather than just one side)?                                                  |
|                | During the last 12 months, have you experienced pain, aching, stiffness or swelling in or around the joint which was not related to an injury and lasted for more than a month? |
| <b>sd5_46a</b> | ...A (neck)                                                                                                                                                                     |
| <b>sd5_46b</b> | ...B (right shoulder)                                                                                                                                                           |
| <b>sd5_46c</b> | ...C (left shoulder)                                                                                                                                                            |
| <b>sd5_46d</b> | ...D (right elbow)                                                                                                                                                              |
| <b>sd5_46e</b> | ...E (left elbow)                                                                                                                                                               |
| <b>sd5_46f</b> | ...F (right hand)                                                                                                                                                               |
| <b>sd5_46g</b> | ...G (left hand)                                                                                                                                                                |
| <b>sd5_46h</b> | ...H (right hip)                                                                                                                                                                |
| <b>sd5_46i</b> | ...I (left hip)                                                                                                                                                                 |
| <b>sd5_46j</b> | ...J (right knee)                                                                                                                                                               |
| <b>sd5_46k</b> | ...K (left knee)                                                                                                                                                                |
| <b>sd5_46l</b> | ...L (right ankle)                                                                                                                                                              |
| <b>sd5_46m</b> | ...M (left ankle)                                                                                                                                                               |
| <b>sd5_46n</b> | ...N (left foot)                                                                                                                                                                |
| <b>sd5_46o</b> | ...O (right foot)                                                                                                                                                               |
| <b>sd5_46p</b> | ...P (wrist)                                                                                                                                                                    |
| <b>sd5_46q</b> | ...Q (thumb)                                                                                                                                                                    |
| <b>sd5_46r</b> | ...R (pinkie finger, lower joint)                                                                                                                                               |
| <b>sd5_46s</b> | ...S (ring finger, lower joint)                                                                                                                                                 |
| <b>sd5_46t</b> | ...T (middle finger, lower joint)                                                                                                                                               |
| <b>sd5_46u</b> | ...U (index finger, lower joint)                                                                                                                                                |
| <b>sd5_46v</b> | ...V (pinkie finger, upper joint)                                                                                                                                               |
| <b>sd5_46w</b> | ...W (index finger, upper joint)                                                                                                                                                |
| <b>sd5_46x</b> | ...X (ring finger, upper joint)                                                                                                                                                 |
| <b>sd5_46y</b> | ...Y (middle finger, upper joint)                                                                                                                                               |
| <b>sd5_47</b>  | Stiffness in the joint in the morning after getting up from bed, or after a long rest of the joint without movement?                                                            |
| <b>sd5_48</b>  | How long does this stiffness last?                                                                                                                                              |
| <b>sd5_49</b>  | Does this stiffness go away after exercise or movement in the joint?                                                                                                            |
| <b>sd5_50</b>  | Have you experienced attacks of wheezing or whistling breathing?                                                                                                                |
| <b>sd5_51</b>  | Attack of wheezing that came on after you stopped exercising or some other physical activity?                                                                                   |
| <b>sd5_52</b>  | A feeling of tightness in your chest?                                                                                                                                           |

|                |                                                                                                                                               |
|----------------|-----------------------------------------------------------------------------------------------------------------------------------------------|
| <b>sd5_53</b>  | Waking up with a feeling of tightness in your chest in the morning or any other time?                                                         |
| <b>sd5_54</b>  | An attack of shortness of breath that came on without obvious cause when you were not exercising or doing some physical activity?             |
| <b>sd5_55</b>  | Pain or discomfort in your chest when you walk uphill or hurry?                                                                               |
| <b>sd5_56</b>  | Pain or discomfort in your chest when you walk at an ordinary pace on level ground?                                                           |
| <b>sd5_57</b>  | Chest discomfort or pain for skip pattern                                                                                                     |
| <b>sd5_58</b>  | What do you do if you get the pain or discomfort when you are walking?                                                                        |
| <b>sd5_59</b>  | If you stand still, what happens to the pain or discomfort? Is it...<br>Will you show me where you usually experience the pain or discomfort? |
| <b>sd5_60a</b> | ...A: right shoulder                                                                                                                          |
| <b>sd5_60b</b> | ...B: right side chest                                                                                                                        |
| <b>sd5_60c</b> | ...C: neck area                                                                                                                               |
| <b>sd5_60d</b> | ...D: upper middle chest                                                                                                                      |
| <b>sd5_60e</b> | ...E: lower middle chest                                                                                                                      |
| <b>sd5_60f</b> | ...F: left side chest                                                                                                                         |
| <b>sd5_60g</b> | ...G: left shoulder                                                                                                                           |
| <b>sd5_60h</b> | ...H: abdomen                                                                                                                                 |
| <b>sd5_61</b>  | In the past 12 months have you experienced cloudy or blurry vision?                                                                           |
| <b>sd5_62</b>  | Vision problems with light, such as seeing glare from bright lights, or seeing halos around lights?                                           |
| <b>sd5_63</b>  | Have you noticed, or has anyone told you that you have whiteness in your eye?                                                                 |
| <b>sd5_64</b>  | Have you passed dark urine during the past two weeks (dark yellow or plain tea color)?                                                        |
| <b>sd5_65</b>  | Did you have icterus (yellow tinge in your body, especially the conjunctiva, palms and skin) during the past two weeks?                       |
| <b>sd5_66</b>  | Was your skin itchy during the past two weeks?                                                                                                |
| <b>sd5_67</b>  | Did you have malena (dark brown or black stools) during the past two weeks?                                                                   |
| <b>sd5_68</b>  | Have you ever vomited blood (haematemesis)?                                                                                                   |
| <b>sd5_69</b>  | Have you noticed abdominal enlargement during the past two weeks?                                                                             |
| <b>sd5_70</b>  | Did you notice swelling around your ankles during the past two weeks?                                                                         |
| <b>sd5_71</b>  | <i>Have you ever had hepatitis in your life or has a diagnosis of hepatitis ever been made by a health provider?</i>                          |
| <b>sd6_1</b>   | <i>Do you have any medicines in the house that a health provider has prescribed for you or given to you?</i>                                  |
| <b>sd6_2</b>   | <i>May I see what medicines you personally have been using in the last 2 weeks?</i>                                                           |
| <b>sd6_3</b>   | <i>Name of prescription from bottle/label:</i>                                                                                                |
| <b>sd6_4a</b>  | <i>How frequently do you use this medicine?</i>                                                                                               |
| <b>sd6_4b</b>  | <i>How frequently do you use this medicine?</i>                                                                                               |
| <b>sd6_5</b>   | <i>Name of prescription from bottle/label:</i>                                                                                                |
| <b>sd6_6a</b>  | <i>How frequently do you use this medicine?</i>                                                                                               |
| <b>sd6_6b</b>  | <i>How frequently do you use this medicine?</i>                                                                                               |
| <b>sd6_7</b>   | <i>Name of prescription from bottle/label:</i>                                                                                                |
| <b>sd6_8a</b>  | <i>How frequently do you use this medicine?</i>                                                                                               |
| <b>sd6_8b</b>  | <i>How frequently do you use this medicine?</i>                                                                                               |

|                |                                                                                                                                 |
|----------------|---------------------------------------------------------------------------------------------------------------------------------|
| <b>sd6_9</b>   | <i>Name of prescription from bottle/label:</i>                                                                                  |
| <b>sd6_10a</b> | <i>How frequently do you use this medicine?</i>                                                                                 |
| <b>sd6_10b</b> | <i>How frequently do you use this medicine?</i>                                                                                 |
| <b>sd6_11</b>  | <i>Name of prescription from bottle/label:</i>                                                                                  |
| <b>sd6_12a</b> | <i>How frequently do you use this medicine?</i>                                                                                 |
| <b>sd6_12b</b> | <i>How frequently do you use this medicine?</i>                                                                                 |
| <b>sd7_1</b>   | <i>Is there anything the research team should be aware of about this respondent that may have affected the quality of data?</i> |
