# Supplementary material for: Validating estimates of prevalence of non-communicable diseases based on household surveys: the symptomatic diagnosis study
Source: Springer Nature journal article supplement (doi:10.1186/s12916-014-0245-8), 2015-01-23
Supplement: MOESM3 [file 9758640]

**Additional file 3. Cutoff for endorsement of each continuous/duration questionnaire item.**

| <b>Item</b>    | <b>Question</b>                                                                                                                                                    | <b>Cutoff</b> |
|----------------|--------------------------------------------------------------------------------------------------------------------------------------------------------------------|---------------|
| <b>sd4_02b</b> | How long ago, in months or years, were you told by a health provider that you have chronic bronchitis, emphysema, or chronic obstructive pulmonary disease (COPD)? | 9.25 years    |
| <b>sd4_05a</b> | How long ago, in months or years, were you told by a health provider that you have heart failure?                                                                  | 1 year        |
| <b>sd4_11b</b> | How long ago, in months or years, were you told by a health provider that you have liver failure?                                                                  | 5.25 years    |
| <b>sd4_14b</b> | How long ago, in months or years, were you told by a health provider that you have angina?                                                                         | 4.7 years     |
| <b>sd4_18b</b> | How long ago, in months or years, were you told by a health provider that you have arthritis?                                                                      | 9.75 years    |
| <b>sd4_21b</b> | How long ago, in months or years, were you told by a health provider that you have asthma?                                                                         | 17.75 years   |
| <b>sd4_24b</b> | How long ago, in months or years, were you told by a health provider that you have depression?                                                                     | 5.4 years     |
| <b>sd4_29b</b> | How long ago, in months or years, was your vision checked by a health provider?                                                                                    | 3 years       |
| <b>sd4_39b</b> | How long ago, in months or years, was your hearing last checked by a health provider?                                                                              | 3.4 years     |
