# Supplementary material for: Validating estimates of prevalence of non-communicable diseases based on household surveys: the symptomatic diagnosis study
Source: Springer Nature journal article supplement (doi:10.1186/s12916-014-0245-8), 2015-01-23
Supplement: MOESM4 [file 9758640]

#### Additional file 4. Results of analysis using different analytic methods

**Table 1: Mean chance-corrected concordance across causes including uncertainty intervals, calculated as the median across 500 splits for each method, with and without HCE.**

| <b>Method</b>        | <b>HCE</b> | <b>Chance-corrected concordance (95% CI)</b> |
|----------------------|------------|----------------------------------------------|
| <b>Tariff</b>        | no HCE     | 53.4% (53.2%, 53.9%)                         |
|                      | with HCE   | 66.1% (65.6%, 66.5%)                         |
| <b>SSP</b>           | no HCE     | 53.9% (53.5%, 54.3%)                         |
|                      | with HCE   | 67.9% (67.4%, 68.3%)                         |
| <b>Random Forest</b> | no HCE     | 52.4% (52.1%, 52.7%)                         |
|                      | with HCE   | 66.9% (66.5%, 67.3%)                         |

**Table 2: Cause-specific chance-corrected concordance using different analytic methods, calculated as the median across 500 splits for each method, with and without HCE.**

|                             | CCC Tariff (%) |                 | CCC SSP (%)   |                 | CCC RF (%)    |                 |
|-----------------------------|----------------|-----------------|---------------|-----------------|---------------|-----------------|
|                             | <i>no HCE</i>  | <i>with HCE</i> | <i>no HCE</i> | <i>with HCE</i> | <i>no HCE</i> | <i>with HCE</i> |
| <b>Depression</b>           | 80.3           | 88.7            | 85.1          | 87.6            | 79.8          | 84.6            |
| <b>Angina pectoris</b>      | 52.9           | 83.9            | 67.6          | 93.6            | 61.0          | 87.1            |
| <b>Cirrhosis</b>            | 68.6           | 93.2            | 69.7          | 91.3            | 67.5          | 93.3            |
| <b>Rheumatoid arthritis</b> | 51.1           | 66.4            | 55.0          | 90.4            | 43.4          | 66.8            |
| <b>Asthma</b>               | 46.7           | 77.5            | 60.7          | 87.8            | 52.2          | 81.7            |
| <b>COPD</b>                 | 27.5           | 52.9            | 28.3          | 56.5            | 35.8          | 64.4            |
| <b>Hearing loss</b>         | 50.3           | 51.1            | 50.9          | 52.8            | 42.2          | 47.0            |
| <b>Cataracts</b>            | 35.8           | 40.0            | 38.1          | 57.9            | 37.4          | 48.4            |
| <b>Vision loss</b>          | 42.2           | 39.1            | 20.3          | 18.4            | 27.8          | 33.1            |
| <b>Osteoarthritis</b>       | 23.6           | 35.8            | 13.0          | 25.9            | 29.6          | 40.1            |
| <b>Control</b>              | 56.0           | 58.1            | 50.4          | 51.4            | 45.0          | 48.7            |

**Table 3: Median CSPF accuracy using different analytic methods with and without HCE information, including uncertainty intervals, calculated as the median across 500 splits for each method.**

| <b>Method</b>        | <b>HCE</b> | <b>CSPF accuracy (95% UI)</b> |
|----------------------|------------|-------------------------------|
| <b>Tariff</b>        | no HCE     | 0.772 (0.765, 0.779)          |
|                      | with HCE   | 0.826 (0.818, 0.834)          |
| <b>SSP</b>           | no HCE     | 0.764 (0.753, 0.771)          |
|                      | with HCE   | 0.817 (0.809, 0.828)          |
| <b>Random Forest</b> | no HCE     | 0.775 (0.767, 0.781)          |
|                      | with HCE   | 0.822 (0.814, 0.829)          |
| <b>King-Lu</b>       | no HCE     | 0.736 (0.729, 0.745)          |
|                      | with HCE   | 0.765 (0.758, 0.772)          |

**Table 4: Cause-specific prevalence fraction absolute error by analytical method, with and without HCE\*.**

| Prevalence fraction absolute error | Tariff        |                 | SSP           |                 | RF            |                 | KL            |                 |
|------------------------------------|---------------|-----------------|---------------|-----------------|---------------|-----------------|---------------|-----------------|
|                                    | <i>no HCE</i> | <i>with HCE</i> | <i>no HCE</i> | <i>with HCE</i> | <i>no HCE</i> | <i>with HCE</i> | <i>no HCE</i> | <i>with HCE</i> |
| Asthma                             | 0.025         | 0.014           | 0.034         | 0.016           | 0.031         | 0.015           | 0.038         | 0.033           |
| Cirrhosis                          | 0.027         | 0.016           | 0.016         | 0.007           | 0.021         | 0.015           | 0.042         | 0.036           |
| COPD                               | 0.031         | 0.021           | 0.034         | 0.024           | 0.034         | 0.023           | 0.048         | 0.043           |
| Angina pectoris                    | 0.030         | 0.020           | 0.026         | 0.024           | 0.032         | 0.026           | 0.044         | 0.039           |
| Osteoarthritis                     | 0.033         | 0.029           | 0.039         | 0.031           | 0.038         | 0.032           | 0.044         | 0.043           |
| Cataracts                          | 0.032         | 0.027           | 0.032         | 0.031           | 0.036         | 0.029           | 0.045         | 0.042           |
| Rheumatoid arthritis               | 0.024         | 0.017           | 0.037         | 0.029           | 0.031         | 0.019           | 0.037         | 0.031           |
| Vision loss                        | 0.047         | 0.038           | 0.036         | 0.030           | 0.049         | 0.037           | 0.043         | 0.043           |
| Depression                         | 0.030         | 0.026           | 0.059         | 0.026           | 0.032         | 0.021           | 0.016         | 0.016           |
| Hearing loss                       | 0.044         | 0.030           | 0.032         | 0.028           | 0.032         | 0.033           | 0.038         | 0.034           |
| Control                            | 0.043         | 0.030           | 0.029         | 0.025           | 0.030         | 0.027           | 0.030         | 0.029           |

\*This table is displayed as a heat map, where larger errors are shaded in darker reds and smaller errors are darker greens. Unshaded (white) is medium error.

**Figure 1: Cause-specific chance-corrected concordance using different analytic methods with and without HCE.**

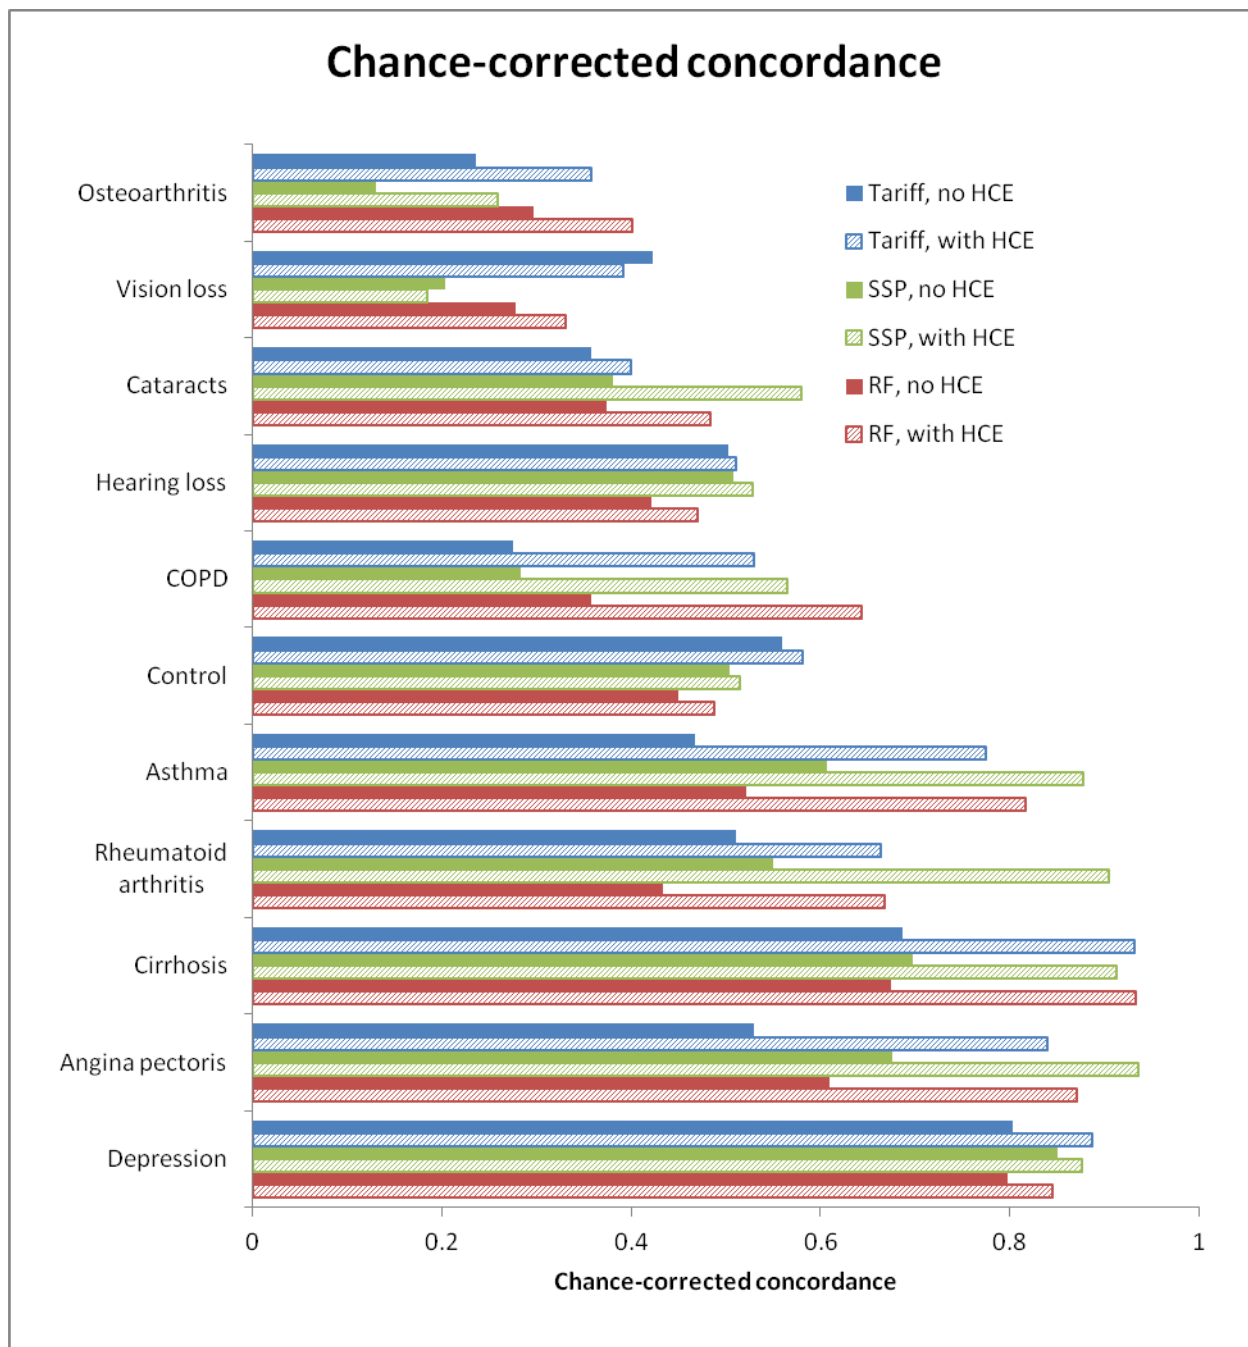

**Figure 2: Cause-specific prevalence fraction error using different analytic methods of analysis, with and without HCE.**

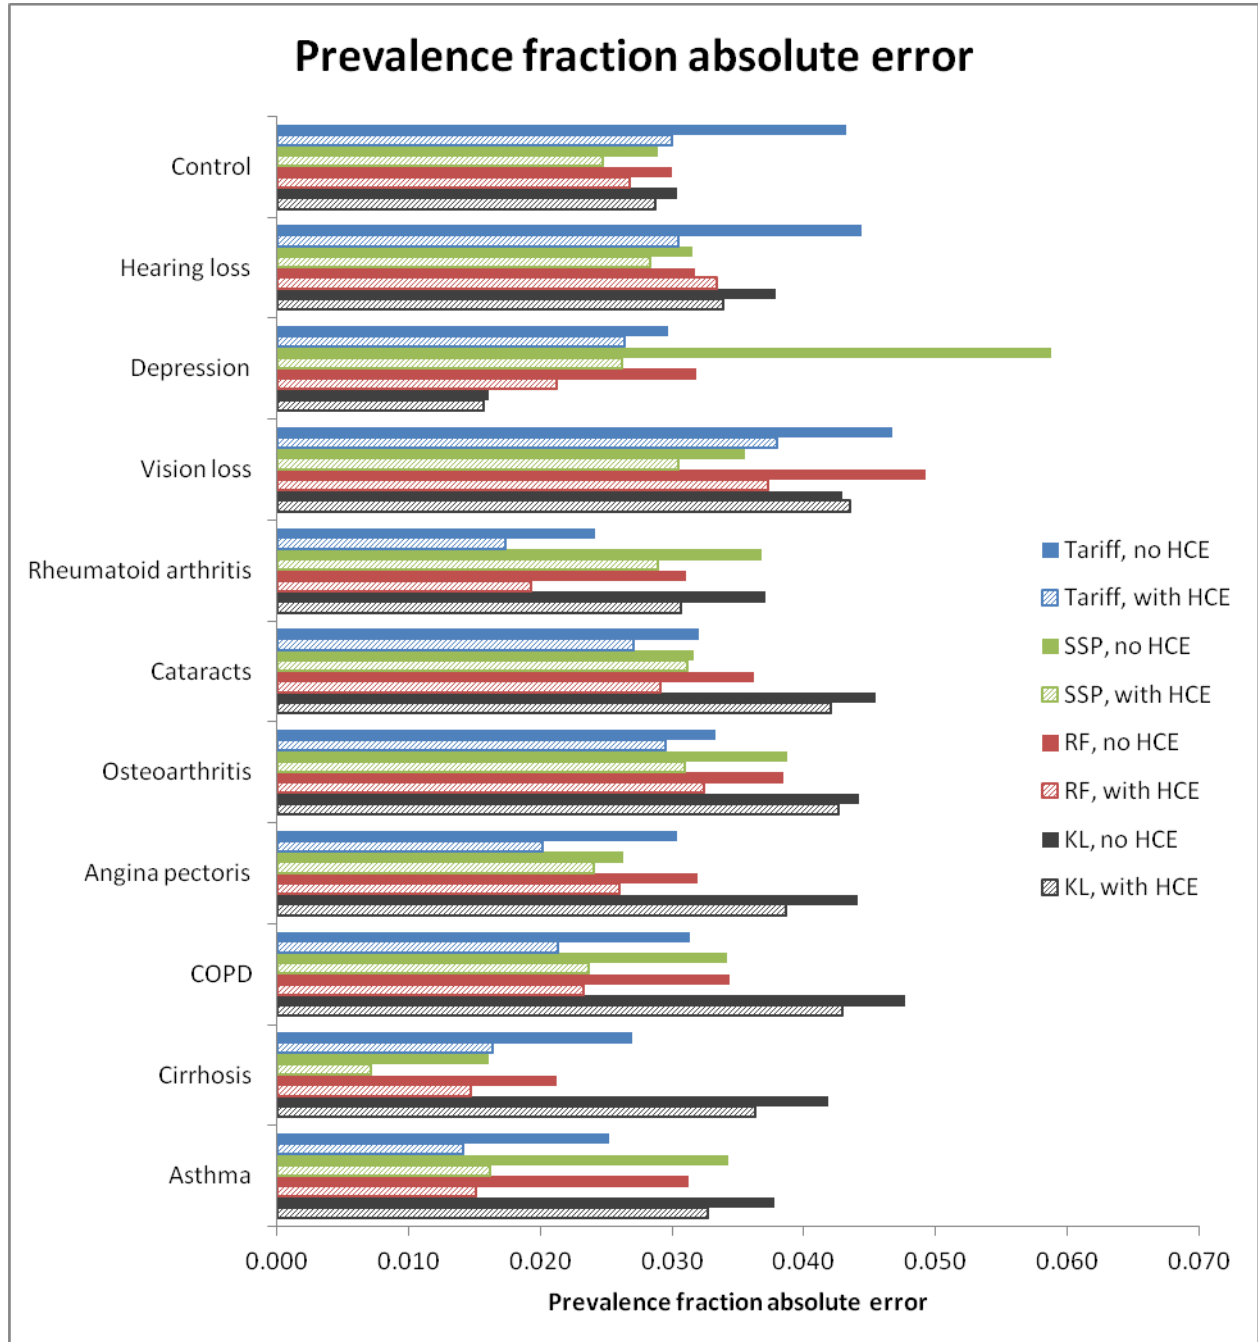

**Additional file 5. Example of confusion matrix for true and estimated cause classifications.**

| Predicted cause:     | Angina pectoris | Osteoarthritis | Rheumatoid arthritis | Asthma    | Cataracts | COPD     | Cirrhosis | Depression | Hearing loss | Vision loss | Control   | Total      |
|----------------------|-----------------|----------------|----------------------|-----------|-----------|----------|-----------|------------|--------------|-------------|-----------|------------|
| <b>True cause:</b>   |                 |                |                      |           |           |          |           |            |              |             |           |            |
| Angina pectoris      | 24              | 1              | 0                    | 0         | 0         | 0        | 0         | 0          | 1            | 0           | 1         | 27         |
| Osteoarthritis       | 2               | 8              | 6                    | 0         | 4         | 0        | 0         | 1          | 2            | 0           | 1         | 24         |
| Rheumatoid arthritis | 1               | 4              | 19                   | 0         | 1         | 0        | 1         | 2          | 0            | 0           | 0         | 28         |
| Asthma               | 0               | 1              | 0                    | 15        | 0         | 1        | 0         | 0          | 1            | 0           | 0         | 18         |
| Cataracts            | 1               | 1              | 0                    | 0         | 10        | 4        | 1         | 2          | 1            | 5           | 2         | 27         |
| COPD                 | 1               | 0              | 0                    | 1         | 1         | 2        | 0         | 0          | 0            | 0           | 0         | 5          |
| Cirrhosis            | 0               | 0              | 0                    | 0         | 0         | 0        | 20        | 0          | 0            | 2           | 1         | 23         |
| Depression           | 0               | 0              | 0                    | 0         | 0         | 0        | 0         | 11         | 0            | 1           | 0         | 12         |
| Hearing loss         | 0               | 0              | 0                    | 0         | 0         | 0        | 0         | 5          | 5            | 0           | 2         | 12         |
| Vision loss          | 3               | 0              | 0                    | 0         | 8         | 0        | 1         | 1          | 3            | 8           | 0         | 24         |
| Control              | 2               | 0              | 0                    | 3         | 1         | 0        | 0         | 3          | 21           | 0           | 20        | 50         |
| <b>Total</b>         | <b>34</b>       | <b>15</b>      | <b>25</b>            | <b>19</b> | <b>25</b> | <b>7</b> | <b>23</b> | <b>25</b>  | <b>34</b>    | <b>16</b>   | <b>27</b> | <b>250</b> |

**Additional file 6. Prevalence fraction absolute error and CSPF accuracy for nine-cause Tariff Method aggregation, with and without HCE. \***

| <b>Prevalence fraction absolute error</b> | <b>Estimates</b> |                 |
|-------------------------------------------|------------------|-----------------|
|                                           | <i>no HCE</i>    | <i>with HCE</i> |
| Cirrhosis                                 | 0.013            | 0.013           |
| Asthma                                    | 0.017            | 0.014           |
| COPD                                      | 0.025            | 0.024           |
| Angina pectoris                           | 0.030            | 0.027           |
| Arthritis                                 | 0.035            | 0.029           |
| Depression                                | 0.032            | 0.029           |
| Hearing loss                              | 0.035            | 0.032           |
| Vision loss or cataracts                  | 0.038            | 0.036           |
| Control                                   | 0.036            | 0.031           |
| CSPF accuracy                             | 0.842            | 0.858           |

\*This table is displayed as a heat map, where larger error is indicated with darker reds and smaller error is indicated with darker greens.
