# Supplementary material for: Validating estimates of prevalence of non-communicable diseases based on household surveys: the symptomatic diagnosis study
Source: Springer Nature journal article supplement (doi:10.1186/s12916-014-0245-8), 2015-01-23
Supplement: MOESM5 [file 9758640]

**Additional file 5. Example of confusion matrix for true and estimated cause classifications.**

| Predicted cause:     | Angina pectoris | Osteoarthritis | Rheumatoid arthritis | Asthma    | Cataracts | COPD     | Cirrhosis | Depression | Hearing loss | Vision loss | Control   | Total      |
|----------------------|-----------------|----------------|----------------------|-----------|-----------|----------|-----------|------------|--------------|-------------|-----------|------------|
| <b>True cause:</b>   |                 |                |                      |           |           |          |           |            |              |             |           |            |
| Angina pectoris      | 24              | 1              | 0                    | 0         | 0         | 0        | 0         | 0          | 1            | 0           | 1         | 27         |
| Osteoarthritis       | 2               | 8              | 6                    | 0         | 4         | 0        | 0         | 1          | 2            | 0           | 1         | 24         |
| Rheumatoid arthritis | 1               | 4              | 19                   | 0         | 1         | 0        | 1         | 2          | 0            | 0           | 0         | 28         |
| Asthma               | 0               | 1              | 0                    | 15        | 0         | 1        | 0         | 0          | 1            | 0           | 0         | 18         |
| Cataracts            | 1               | 1              | 0                    | 0         | 10        | 4        | 1         | 2          | 1            | 5           | 2         | 27         |
| COPD                 | 1               | 0              | 0                    | 1         | 1         | 2        | 0         | 0          | 0            | 0           | 0         | 5          |
| Cirrhosis            | 0               | 0              | 0                    | 0         | 0         | 0        | 20        | 0          | 0            | 2           | 1         | 23         |
| Depression           | 0               | 0              | 0                    | 0         | 0         | 0        | 0         | 11         | 0            | 1           | 0         | 12         |
| Hearing loss         | 0               | 0              | 0                    | 0         | 0         | 0        | 0         | 5          | 5            | 0           | 2         | 12         |
| Vision loss          | 3               | 0              | 0                    | 0         | 8         | 0        | 1         | 1          | 3            | 8           | 0         | 24         |
| Control              | 2               | 0              | 0                    | 3         | 1         | 0        | 0         | 3          | 21           | 0           | 20        | 50         |
| <b>Total</b>         | <b>34</b>       | <b>15</b>      | <b>25</b>            | <b>19</b> | <b>25</b> | <b>7</b> | <b>23</b> | <b>25</b>  | <b>34</b>    | <b>16</b>   | <b>27</b> | <b>250</b> |
