# Supplementary material for: Validating estimates of prevalence of non-communicable diseases based on household surveys: the symptomatic diagnosis study
Source: Springer Nature journal article supplement (doi:10.1186/s12916-014-0245-8), 2015-01-23
Supplement: MOESM6 [file 9758640]

**Additional file 6. Prevalence fraction absolute error and CSPF accuracy for nine-cause Tariff Method aggregation, with and without HCE. \***

| Prevalence fraction absolute error | Estimates     |                 |
|------------------------------------|---------------|-----------------|
|                                    | <i>no HCE</i> | <i>with HCE</i> |
| Cirrhosis                          | 0.013         | 0.013           |
| Asthma                             | 0.017         | 0.014           |
| COPD                               | 0.025         | 0.024           |
| Angina pectoris                    | 0.030         | 0.027           |
| Arthritis                          | 0.035         | 0.029           |
| Depression                         | 0.032         | 0.029           |
| Control                            | 0.036         | 0.031           |
| Hearing loss                       | 0.035         | 0.032           |
| Vision loss or cataracts           | 0.038         | 0.036           |
| CSPF accuracy                      | 0.842         | 0.858           |

\*This table is displayed as a heat map, where larger error is indicated with darker reds and smaller error is indicated with darker greens.
